# Supplementary material for: Enhanced removal of methylene blue using KMnO4-modified kitchen waste-derived lignin
Source: Royal Society of Chemistry journal article supplement (doi:10.1039/d4nj05120c), 2025-01-01
Supplement: d4nj05120c1.pdf [file d4nj05120c1.pdf]

## Supplementary Material

### Enhanced removal of methylene blue by $\text{KMnO}_4$ -modified kitchen waste-derived lignin

Hao Hu<sup>1,\*</sup>, Kui Li<sup>1</sup>, Yan-Jun Liu<sup>2</sup>, Zheng-Hao Li<sup>3</sup>, Yan-Kun Liu<sup>1</sup>, Lian-Kun Dong<sup>a</sup>,  
Kun Ding<sup>1,\*\*</sup>

<sup>1</sup> Anhui Provincial Key Laboratory of Environmental Pollution Control and Resource Reuse, School of Environment and Energy Engineering, Anhui Jianzhu University, Hefei 230601, P.R. China

<sup>2</sup> Department of Ocean Science and Center for Ocean Research in Hong Kong and Macau, The Hong Kong University of Science and Technology, Hong Kong, 999077, China

<sup>3</sup> Department of Environmental Science and Engineering, University of Science and Technology of China, Hefei, 230026, China

\*: Corresponding author

Dr. Hao Hu

Fax: +86 551-63828252

Email: huhao2019@ustc.edu.cn

\*\* : Corresponding author

Prof. Kun Ding

Fax: +86 551- 63513056

Email: dkun@ahjzu.edu.cn

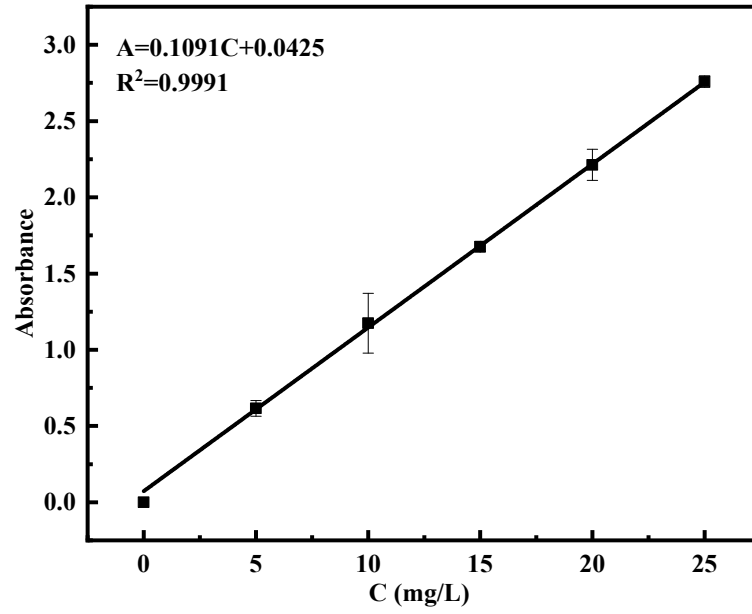

**Fig. S1** Standard curve of methylene blue solution

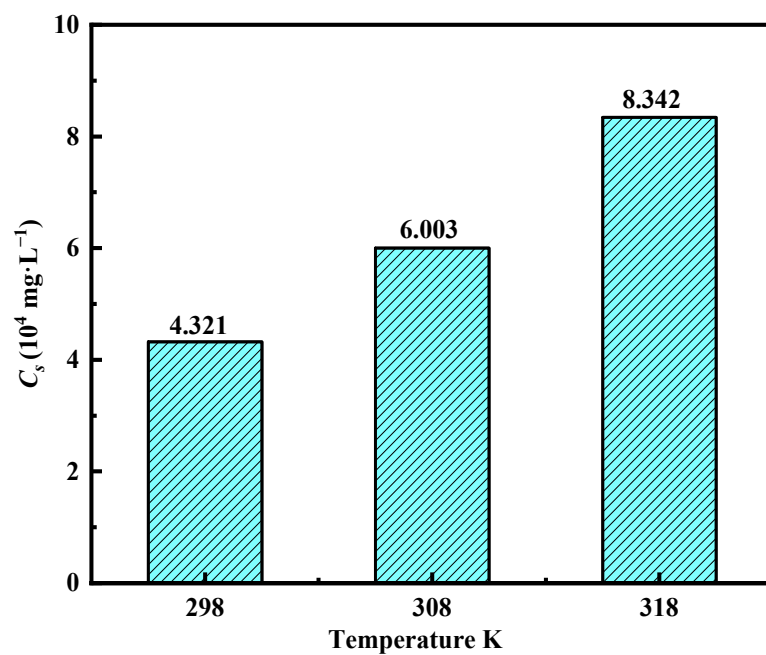

**Fig. S2** Maximum dissolved mass concentration of MB (Salimi et al., 2019)

**Table S1** Experimental conditions for removal of MB in dye wastewater.

| Experimental group | MB concentration/<br>mg/L | Wastewater volume/<br>mL | Dosage of adsorbent<br>/mg | pH of wastewater          | Adsorbent time (Min)                       | Temperature of wastewater (K) |
|--------------------|---------------------------|--------------------------|----------------------------|---------------------------|--------------------------------------------|-------------------------------|
| Dosage impact      | 100                       | 50                       | 25,50,100,150,200,250      | 9.0                       | 360                                        | 298                           |
| pH impact          | 100                       | 50                       | 150                        | 3.0,5.0,7.0,9.0,11.0,13.0 | 360                                        | 298                           |
| Time impact        | 50,100                    | 50                       | 150                        | 9.0                       | 5,30,60,90,120,180,240,300,360,420,480,540 | 298                           |
| Temperature impact | 40~150                    | 50                       | 150                        | 9.0                       | 360                                        | 298,308,318                   |

## Reference

Salimi, A., and Roosta, A. 2019. Experimental solubility and thermodynamic aspects of methylene blue in different solvents. *Thermochim. Acta* 675,134-139. <http://10.1016/j.tca.2019.03.024>.
